# Supplementary material for: “Gate-keeper” Residues and Active-Site Rearrangements in DNA Polymerase μ Help Discriminate Non-cognate Nucleotides
Source: PLOS journal article supplement (doi:10.1371/journal.pcbi.1003074), 2013-05-23
Supplement: S11 (10.1371/journal.pcbi.1003074.s011) [file journal.pcbi.1003074.s011]

301 Moved Permanently

# Moved Permanently

The document has moved here.

---

Apache Server at www.ploscompbiol.org Port 80
