# Supplementary material for: “Gate-keeper” Residues and Active-Site Rearrangements in DNA Polymerase μ Help Discriminate Non-cognate Nucleotides
Source: PLOS journal article supplement (doi:10.1371/journal.pcbi.1003074), 2013-05-23
Supplement: S12 (10.1371/journal.pcbi.1003074.s012) [file journal.pcbi.1003074.s012]

**Table S1. Distance between “gate-keeper” residues and the upstream primer in pol  $\beta$ , pol  $\lambda$ , and pol  $\mu$  complexes.**

|                                 | Distance in dNTP-free system (Å) <sup>a</sup> | Distance in cognate system (Å) | Average (Å) |
|---------------------------------|-----------------------------------------------|--------------------------------|-------------|
| <b>Pol <math>\beta</math></b>   |                                               |                                |             |
| Arg258                          | 5.0                                           | 7.2                            | 6.1         |
| Phe272                          | 7.5                                           | 4.7                            | 6.1         |
| <b>Pol <math>\lambda</math></b> |                                               |                                |             |
| Tyr505                          | 6.6                                           | 4.9                            | 5.8         |
| Phe506                          | 5.7                                           | 5.1                            | 5.4         |
| Arg517                          | 9.5                                           | 8.4                            | 9.0         |
| <b>Pol <math>\mu</math></b>     |                                               |                                |             |
| Trp436 <sup>b</sup>             | 4.2                                           | 3.7                            | 4.0         |
| Gln440                          | 7.6                                           | 8.7                            | 8.2         |
| Glu443                          | 8.8                                           | 9.6                            | 9.2         |
| Arg444                          | 9.4                                           | 8.9                            | 9.2         |

<sup>a</sup> Distance is chosen from the flexible end of each “gate-keep” residue to the nearest heavy atom of the upstream primer. Data shown are average values from 20 ns MD simulation of corresponding systems.

<sup>b</sup> Trp436 only functions as “gate-keeper” residue in one non-cognate system (A:dGTP).
