# Supplementary material for: “Gate-keeper” Residues and Active-Site Rearrangements in DNA Polymerase μ Help Discriminate Non-cognate Nucleotides
Source: PLOS journal article supplement (doi:10.1371/journal.pcbi.1003074), 2013-05-23
Supplement: S13 (10.1371/journal.pcbi.1003074.s013) [file journal.pcbi.1003074.s013]

**Table S2. Protonation states of titratable side chains and phosphate groups in pol  $\mu$ .**

| Residue                 | Charge | pKa  |
|-------------------------|--------|------|
| Phosphate groups in DNA | −1     | 1.2  |
| Asp                     | −1     | 3.9  |
| Glu                     | −1     | 4.3  |
| His                     | 0      | 6.5  |
| Lys                     | +1     | 10.8 |
| Arg                     | +1     | 12.5 |
